# Supplementary material
Source: PubMed Central journal article supplement (PMC2678639)
Supplement: 0813386106_0813386106SI.pdf [file 0813386106_0813386106SI.pdf]

# Supporting Information

Scott et al. 10.1073/pnas.0813386106

## SI Methods

**Assessment of Stratification.** In each set of study samples we performed principal components (PC) analysis based on the sample genotypes (1) in unrelated individuals.

**NIMH/Pritzker.** We chose every 5th genotyped SNP in the genome for the PC analysis in 1,478 unrelated individuals, choosing 1 person per sibling pair. We assigned the non-included relatives the PC values of the included relative. We excluded 6 individuals with PC >6 SD from the mean of 1 or more of the top 10 PCs.

**GSK.** We chose SNPs for PC analysis after removing SNPs located in 4 regions of high LD (2) Within windows of 1,500 SNPs, we selected SNPs with pairwise  $r^2 < 0.2$ . We used the Tracy-Widom test (as described in ref. 2) to assess the significance of the PCs and retained 16 PCs with P value < .05. 26 samples had a PC >6 SD from the mean and were excluded. We repeated the PC analysis with the remaining samples and obtained 7 significant PCs.

**WTCCC.** We chose every 5th genotyped SNP in the genome for the PC analysis. 120 individuals differed by >6 SD from the mean of a PC (110 from the first PC with 17 case and 93 controls). We retained these individuals to mirror the analysis used by the WTCCC (3).

**GWA Analysis.** We eliminated 694 SNPs with allele frequency differences >.2 for any pair of studies. We analyzed the observed allele counts or imputed allele dosages using logistic regression assuming an additive genetic model, with covariates as described below, and then repeated the GWA analysis without PCs.

**NIMH/Pritzker.** We included the 10 most significant PCs as covariates. To account for the presence of case siblings, we used a sandwich estimator (4) to adjust the estimated variances. By clustering on the sibships, the sandwich estimator provides consistent estimates of the variances for the parameters of interest. We also analyzed the data without PC using the sandwich estimator and a method proposed by Bourgain et al. (5). The Bourgain method uses  $\chi^2$  test statistic that takes account of the familial relationship in the association test; however, the method cannot adjust for covariates.

**GSK.** We included recruitment site and the 7 significant PCs as covariates. We analyzed the full sample and we also analyzed a reduced sample removing the 261 London cases in the WTCCC sample.

**WTCCC.** We compared the BP cases to the extended reference set as our primary analysis. We also tested for marker association comparing the WTCCC NBS controls to the combined 6 sets of non-BP cases. Because of strong signals in this latter analysis in the HLA region on chromosome 6 from 27.2 to 34.0 Mb, we excluded the 5,571 autoimmune disease cases (type 1 diabetes, Crohn's disease, rheumatoid arthritis) from the primary GWA analysis of this region. We included the top 10 PCs as covariates.

**Meta-analysis of GWA Samples.** We performed a fixed effects meta-analysis using the OR and 95% confidence intervals to combine the association evidence from the study-specific GWA analyses. We used association results for experimentally derived genotypes when available, and for imputed genotypes otherwise.

2,366,197 autosomal SNPs passed QC and had  $MAF \geq .01$  in all 3 samples; 75,477 were genotyped in all 3 samples, 412,455 in 2, 312,438 in 1, and 1,565,827 in no samples. Association results were oriented relative to the forward strand of the reference genome (dbSNP125). We adjusted for the genomic control values in each study separately for genotyped and imputed SNPs by increasing the standard error of the OR estimate to correspond to the genomic control P value. Evidence for heterogeneity between ORs was assessed using Cochran's Q statistic and  $I^2$  (6).

## Assessment of Independence of Associated SNPs in Selected Regions.

In our 3 regions of strongest association in the 3-study meta-analysis, we tested whether the most strongly associated SNP in the region could account for the association signals at nearby SNPs by including the most strongly associated SNP as a covariate in the logistic regression for each study. Adjusted association results were then combined using fixed effects meta-analysis as described above.

## SI Results

### Evaluation of the Sandwich Estimator in the Case-Control Analysis of NIMH/Pritzker Sample and Comparison of Results of Analysis with 1 or 2 Siblings per Family.

We compared the NIMH/Pritzker BP association results using the sandwich estimator (4) but without covariates to those using Bourgain's method (5). The Pearson correlation coefficient was 0.9994 between the logarithm (base 10) of the P values from the 2 approaches. We also compared the analysis of the full NIMH/Pritzker sample to one with a single sibling per family. The correlation coefficient was .87 and the results were randomly distributed around the expected diagonal line. These results suggest that inclusion of siblings in the case-control analysis was appropriately accounted for with the use of the sandwich estimator.

**GWA Sample Overlap.** The sample sets analyzed in the 3-study meta-analysis overlap those from other BP GWAS. 484 of the NIMH controls were included in the Ferreira et al. study (7). In our meta-analysis, for WTCCC controls we used the NBS sample and the expanded control set that included the WTCCC non-BP cases. WTCCC (3) and Ferreira et al. (7) primary analyses included as controls only the NBS and 1958 Birth Cohort controls, while their secondary analyses included the expanded control set. Our 3-sample meta-analysis set contains 1,833 cases and 992 controls independent of those in the Ferreira et al. (7) analyses. Many of the cases and controls in the pool-based GWAS (8) overlap with our NIMH/Pritzker samples. Finally, 437 cases and 357 controls from our NIMH/Pritzker sample are included in the GAIN GWAS (Nicholas Schork, personal communication).

**SI ACKNOWLEDGMENTS.** We thank Pablo Gejman for collection of the National Institute of Mental Health (NIMH) Bipolar Disorder Genetics Initiative control samples. Data and biomaterials for bipolar cases were collected as part of 10 projects that participated in the National Institute of Mental Health (NIMH) Bipolar Disorder Genetics Initiative. From 1999–03, the Principal Investigators and Co-Investigators were: Indiana University, Indianapolis, IN, R01 MH59545, John Nurnberger, M.D., Ph.D., Marvin J. Miller, M.D., Elizabeth S. Bowman, M.D., N. Leela Rau, M.D., P. Ryan Moe, M.D., Nalini Samavedy, M.D., Rif El-Mallakh, M.D. (at University of Louisville), Hussein Manji, M.D. (at Wayne State University), Debra A. Glitz, M.D. (at Wayne State University), Eric T. Meyer, M.S., Carrie Smiley, R.N., Tatiana Foroud, Ph.D., Leah Flury, M.S., Danielle M. Dick, Ph.D., Howard Edenberg, Ph.D.; Washington University, St. Louis, MO, R01 MH059534, John Rice, Ph.D., Theodore Reich, M.D., Allison Goate, Ph.D., Laura Bierut, M.D.; Johns Hopkins University, Baltimore, MD, R01

MH59533, Melvin McInnis M.D., J. Raymond DePaulo, Jr., M.D., Dean F. MacKinnon, M.D., Francis M. Mondimore, M.D., James B. Potash, M.D., Peter P. Zandi, Ph.D., Dimitrios Avramopoulos, and Jennifer Payne; University of Pennsylvania, PA, R01 MH59553, Wade Berrettini M.D., Ph.D.; University of California at Irvine, CA, R01 MH60068, William Byerley M.D., and Mark Vawter M.D.; University of Iowa, IA, R01 MH059548, William Coryell M.D., and Raymond Crowe M.D.; University of Chicago, IL, R01 MH59535, Elliot Gershon, M.D., Judith Badner Ph.D., Francis McMahon M.D., Chunyu Liu Ph.D., Alan Sanders M.D., Maria Caserta, Steven Dinwiddie M.D., Tu Nguyen, Donna

Harakal; University of California at San Diego, CA, R01 MH59567, John Kelsoe, M.D., Rebecca McKinney, B.A.; Rush University, IL, R01 MH059556, William Scheftner M.D., Howard M. Kravitz, D.O., M.P.H., Diana Marta, B.S., Annette Vaughn-Brown, M.S.N., R.N., and Lauri Bederow, M.A.; NIMH Intramural Research Program, Bethesda, MD, 1Z01MH002810-01, Francis J. McMahon, M.D., Layla Kassem, PsyD., Sevilla Detera-Wadleigh, Ph.D., Lisa Austin, Ph.D., Dennis L. Murphy, M.D. A full list of investigators who contributed to generation of the WTCCC data are available at [www.wtccc.org.uk](http://www.wtccc.org.uk). Funding for the WTCCC was provided by the Wellcome Trust under award 076113.

1. Price AL, et al (2006) Principal components analysis corrects for stratification in genome-wide association studies. *Nat Genet* 38:904–909.
2. Patterson N, Price AL, Reich D (2006) Population structure and eigenanalysis. *PLoS Genet* 2:2074–2093.
3. Wellcome Trust Case Control Consortium (2007) Genome-wide association study of 14,000 cases of seven common diseases and 3,000 shared controls. *Nature* 447:661–678.
4. White H (1982) Maximum likelihood estimation of misspecified model. *Econometrica* 50:1–25.
5. Bourgain C, et al. (2003) Novel case-control test in a founder population identifies P-selectin as an atopy-susceptibility locus. *Am J Hum Genet* 73:612–626.
6. Higgins JP, Thompson SG, Deeks JJ, Altman DG (2003) Measuring inconsistency in meta-analyses. *Br Med J* 327:557–560.
7. Ferreira MA, et al. (2008) Collaborative genome-wide association analysis supports a role for *ANKK1* and *CACNA1C* in bipolar disorder. *Nat Genet* 40:1056–1058.
8. Baum AE, et al. (2008) A genome-wide association study implicates diacylglycerol kinase eta (*DGKH*) and several other genes in the etiology of bipolar disorder. *Mol Psychiatry* 13:197–207.



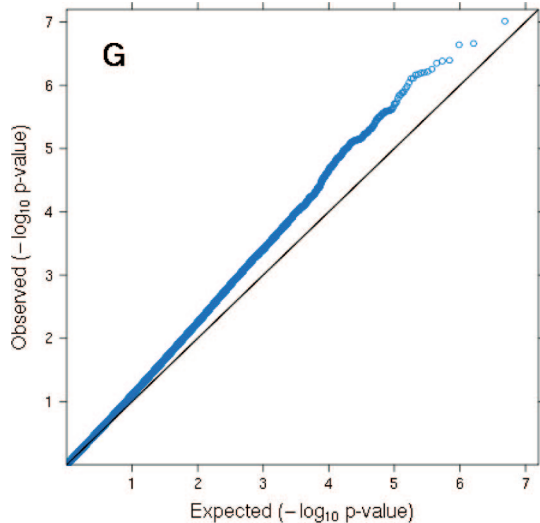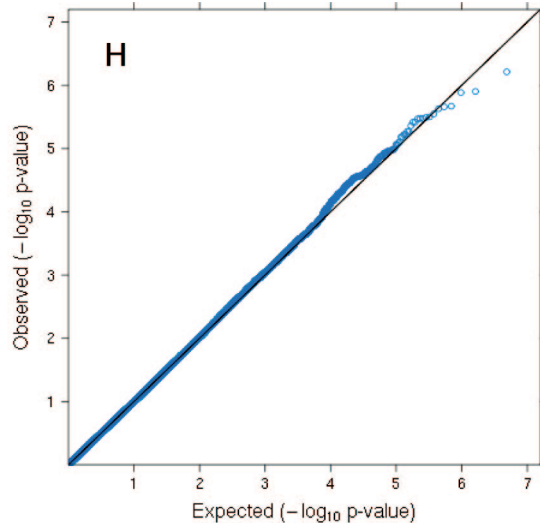

Fig. S1 (continued).

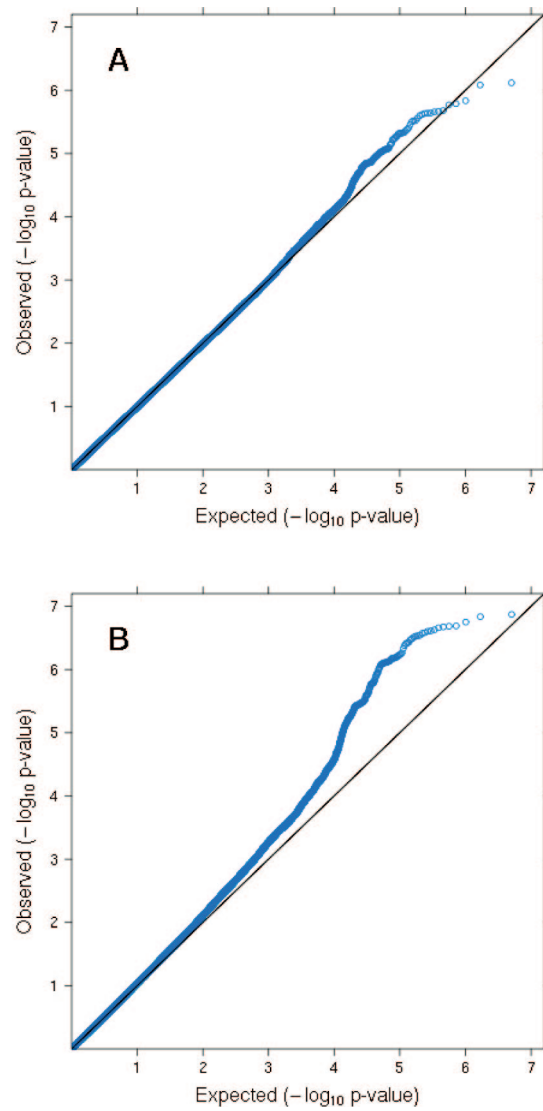

**Fig. S2.** Quantile-quantile plots of observed vs. expected  $-\log_{10} P$  values for BP association meta-analysis including principal components as covariates. (A) NIMH/Pritzker and GSK (complete sample). (B) NIMH/Pritzker, GSK (reduced sample), and WTCCC.

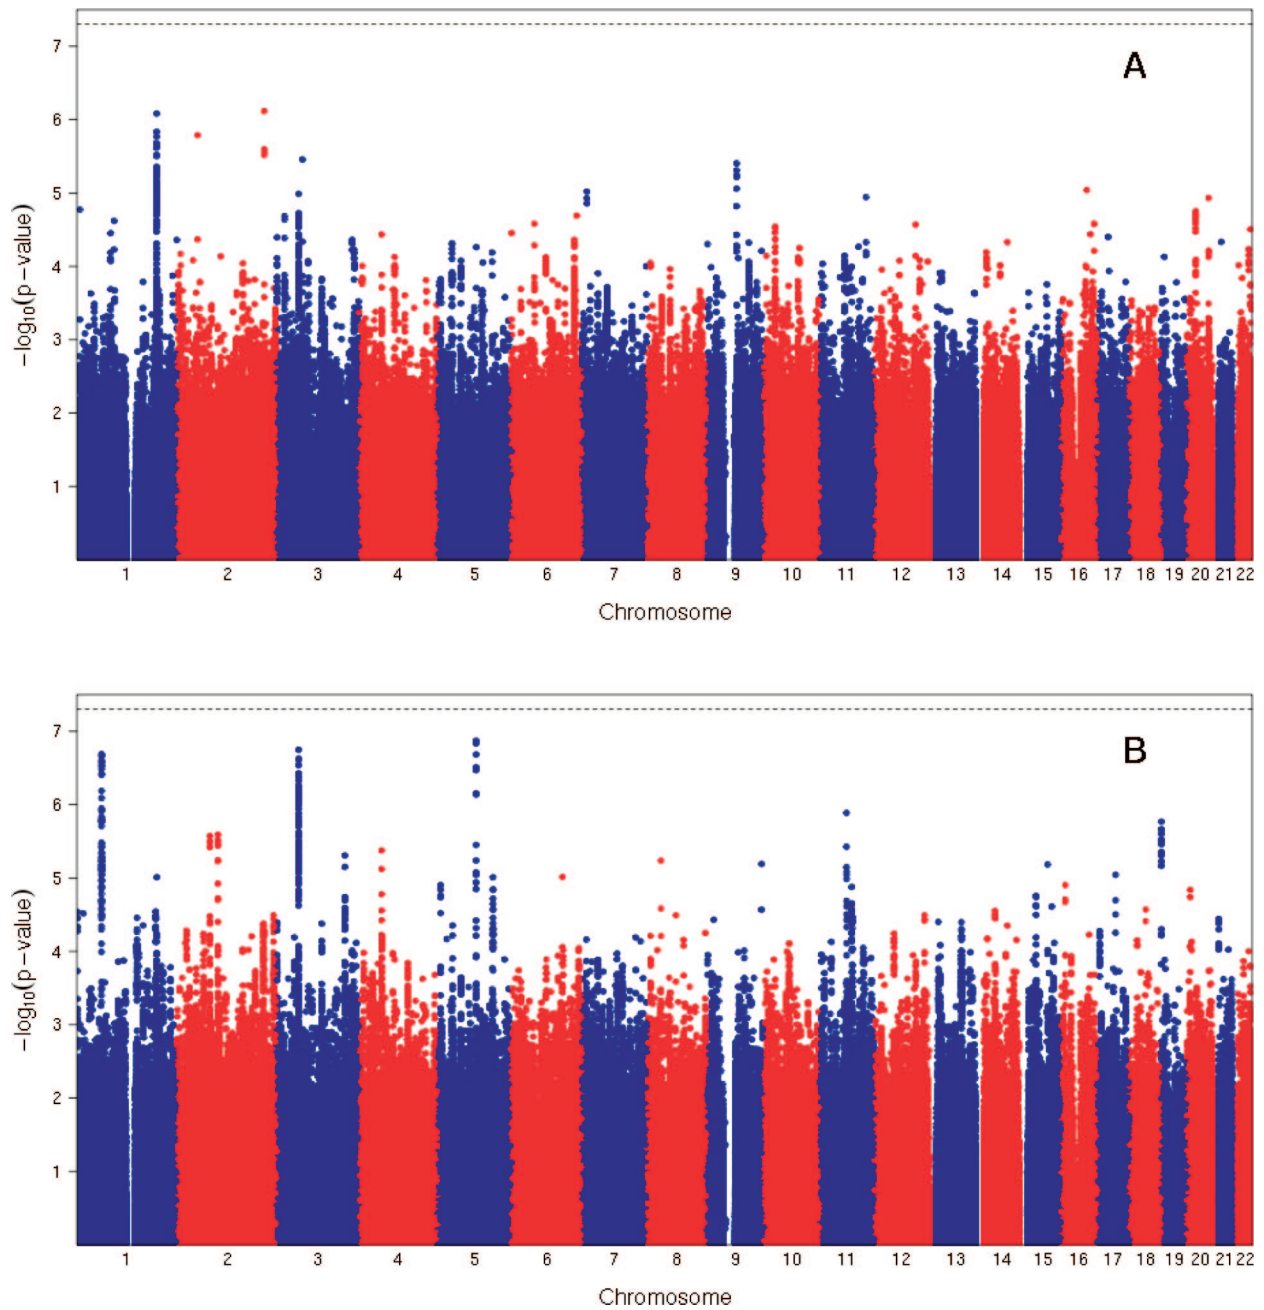

**Fig. S3.** Plots of  $-\log_{10} P$  values for BP meta-analysis including principal components as covariates. (A) NIMH/Pritzker and GSK (complete sample). (B) NIMH/Pritzker, GSK (reduced sample), and WTCCC. The dotted line corresponds to a genome-wide significance threshold  $P = 5 \times 10^{-8}$ .



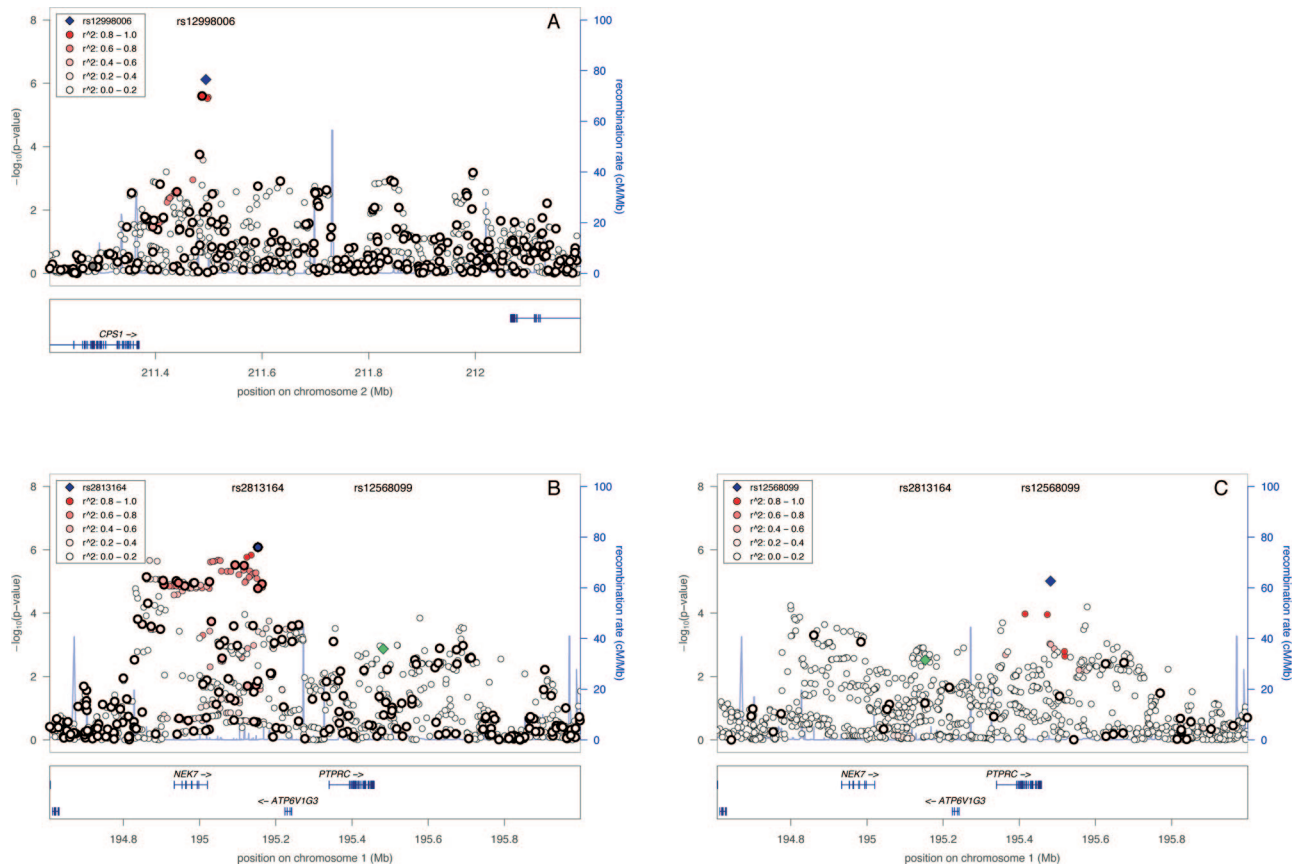

**Fig. 54.** Plot of  $-\log_{10} P$  values for NIMH/Pritzker and GSK (complete sample) (A and B) and NIMH/Pritzker, GSK (reduced sample), and WTCCC BP-association meta-analysis for chromosomal regions with  $P$  values  $< 10^{-6}$  in NIMH/Pritzker and GSK (complete sample) meta-analysis (C). B and C show the same chromosome 1 region. Estimated recombination rates (from Hap Map) are plotted in cyan. Stronger red intensity indicates higher  $r^2$  with the most significant SNP (purple diamond). The most strongly associated SNP in the other panel is shown in green. SNPs genotyped in all 2 or 3 samples are denoted by a thick black circle. refFLAT annotated genes are shown in A–C Lower.

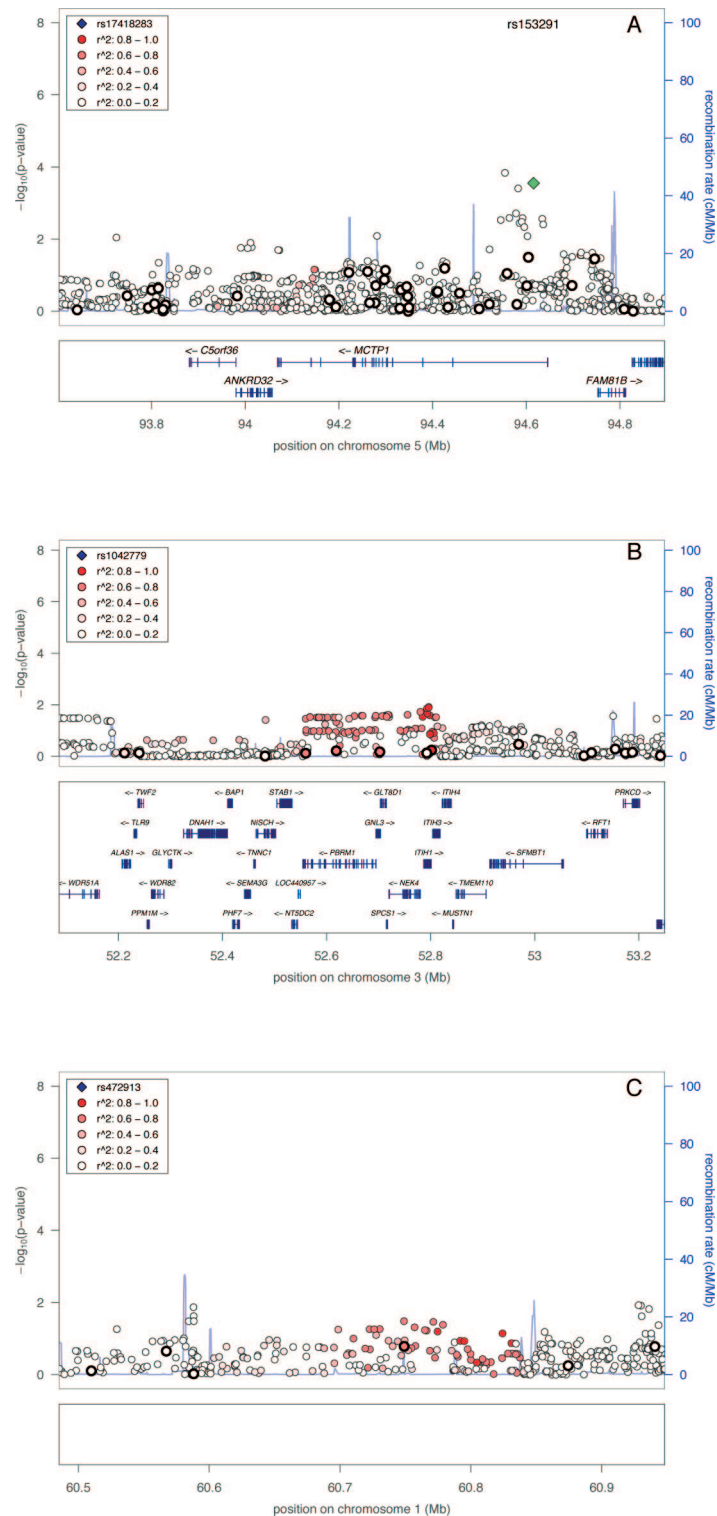

**Fig. S5.** Plot of  $-\log_{10} P$  values for NIMH/Pritzker, GSK (reduced sample), and WTCCC BP association meta-analysis of individual study results conditioned on most strongly associated regional SNP. For each study and region, SNPs were analyzed using a logistic regression model containing the most strongly associated SNP. (A) rs17418283. (B) rs10426779. (C) rs472913. Estimated recombination rates (from Hap Map) are plotted in cyan. Stronger red intensity indicates higher  $r^2$  with the most strongly associated SNP (purple diamond). SNPs genotyped in all 3 samples are denoted by a thick black circle. refFLAT annotated genes are shown in A–C Lower. A decrease in the  $-\log_{10} P$  value from Fig. 1 indicates that the association signal of the surrounding SNPs can be explained, at least in part, by the most strongly associated SNP. Inclusion of a different nearby strongly associated SNP would have resulted in a similar picture.



Table S1A. NIMH/Pritzker and GSK (complete sample) bipolar meta-analysis association results: loci with  $P < 10^{-5}$

| SNP        | Chr | Position*<br>bp | Risk/<br>nonrisk<br>allele | Control<br>risk<br>allele<br>freq <sup>†</sup> | NIMH/Pritzker       |                      | GSK                 |                      | Meta                |                      | Heterogeneity             |          |
|------------|-----|-----------------|----------------------------|------------------------------------------------|---------------------|----------------------|---------------------|----------------------|---------------------|----------------------|---------------------------|----------|
|            |     |                 |                            |                                                | OR (95% CI)         | <i>P</i>             | OR (95% CI)         | <i>P</i>             | OR (95% CI)         | <i>P</i>             | <i>I</i> <sup>2</sup> , % | <i>P</i> |
| rs2813164  | 1   | 195,153,065     | G/A                        | 0.28                                           | 1.39<br>(1.19–1.62) | $2.1 \times 10^{-5}$ | 1.24<br>(1.07–1.44) | 0.0048               | 1.31<br>(1.18–1.46) | $8.3 \times 10^{-7}$ | 9                         | 0.30     |
| rs7593459  | 2   | 49,607,351      | T/A                        | 0.40                                           | 1.27<br>(1.09–1.48) | 0.0019               | 1.31<br>(1.14–1.51) | 0.00014              | 1.29<br>(1.16–1.44) | $1.6 \times 10^{-6}$ | 0                         | 0.76     |
| rs12998006 | 2   | 211,494,512     | T/C                        | 0.72                                           | 1.27<br>(1.07–1.5)  | 0.0061               | 1.42<br>(1.21–1.66) | $1.3 \times 10^{-5}$ | 1.35<br>(1.2–1.51)  | $7.6 \times 10^{-7}$ | 0                         | 0.33     |
| rs11711888 | 3   | 62,132,251      | A/G                        | 0.96                                           | 3.31<br>(1.84–5.96) | $6.7 \times 10^{-5}$ | 2.20<br>(1.24–3.91) | 0.0071               | 2.69<br>(1.77–4.08) | $3.5 \times 10^{-6}$ | 0                         | 0.33     |
| rs10246960 | 7   | 12,478,653      | T/C                        | 0.14                                           | 1.41<br>(1.16–1.71) | 0.00061              | 1.33<br>(1.1–1.61)  | 0.0034               | 1.37<br>(1.19–1.57) | $9.6 \times 10^{-6}$ | 0                         | 0.68     |
| rs7867133  | 9   | 72,037,564      | A/G                        | 0.72                                           | 1.23<br>(1.04–1.44) | 0.013                | 1.39<br>(1.19–1.63) | $3.3 \times 10^{-5}$ | 1.31<br>(1.17–1.47) | $3.9 \times 10^{-6}$ | 20                        | 0.26     |
| rs17498325 | 16  | 63,499,388      | G/A                        | 0.82                                           | 1.42<br>(1.09–1.87) | 0.010                | 1.46<br>(1.2–1.79)  | 0.00021              | 1.45<br>(1.23–1.71) | $9.1 \times 10^{-6}$ | 0                         | 0.88     |

\*NCBI Build 35-bp position.

<sup>†</sup>Weighted average of control risk allele frequency for NIMH/Pritzker and GSK (complete sample).

**Table S1B. Comparison of NIMH/Pritzker and GSK (complete sample) bipolar meta-analysis to WTCCC association results: loci with  $P < 10^{-5}$**

| SNP        | Chr | Position*<br>bp | Risk/<br>nonrisk<br>allele | Control<br>risk<br>allele<br>freq <sup>†</sup> | Meta NIMH/Pritzker and GSK<br>(complete sample) |                      | WTCCC               |          | Meta NIMH/Pritzker,<br>GSK (reduced sample),<br>and WTCCC |          |
|------------|-----|-----------------|----------------------------|------------------------------------------------|-------------------------------------------------|----------------------|---------------------|----------|-----------------------------------------------------------|----------|
|            |     |                 |                            |                                                | OR (95% CI)                                     | <i>P</i>             | OR (95% CI)         | <i>P</i> | OR (95% CI)                                               | <i>P</i> |
| rs2813164  | 1   | 195,153,065     | G/A                        | 0.28                                           | 1.31<br>(1.18–1.46)                             | $8.3 \times 10^{-7}$ | 1.01<br>(0.93–1.09) | 0.82     | 1.11<br>(1.03–1.18)                                       | 0.0030   |
| rs7593459  | 2   | 49,607,351      | T/A                        | 0.40                                           | 1.29<br>(1.16–1.44)                             | $1. \times 10^{-6}$  | 1.00<br>(0.93–1.08) | 0.97     | 1.08<br>(1.02–1.16)                                       | 0.012    |
| rs12998006 | 2   | 211,494,512     | T/C                        | 0.72                                           | 1.35<br>(1.20–1.51)                             | $7.6 \times 10^{-7}$ | 1.07<br>(0.97–1.17) | 0.16     | 1.16<br>(1.08–1.26)                                       | 0.00013  |
| rs11711888 | 3   | 62,132,251      | A/G                        | 0.96                                           | 2.69<br>(1.77–4.08)                             | $3.5 \times 10^{-6}$ | 1.08<br>(0.82–1.43) | 0.58     | 1.45<br>(1.13–1.85)                                       | 0.0035   |
| rs10246960 | 7   | 12,478,653      | T/C                        | 0.14                                           | 1.37<br>(1.19–1.57)                             | $9.6 \times 10^{-6}$ | 1.06<br>(0.97–1.17) | 0.21     | 1.15<br>(1.06–1.25)                                       | 0.0012   |
| rs7867133  | 9   | 72,037,564      | A/G                        | 0.72                                           | 1.31<br>(1.17–1.47)                             | $3.9 \times 10^{-6}$ | 1.01<br>(0.93–1.09) | 0.84     | 1.11<br>(1.04–1.19)                                       | 0.0032   |
| rs17498325 | 16  | 63,499,388      | G/A                        | 0.82                                           | 1.45<br>(1.23–1.71)                             | $9.1 \times 10^{-6}$ | 1.04<br>(0.94–1.15) | 0.41     | 1.15<br>(1.05–1.26)                                       | 0.0036   |

GSK reduced sample: Excluding 261 BP cases also present in WTCCC sample.

\*NCBI Build 35-bp position.

<sup>†</sup>Weighted average of control risk allele frequency for NIMH/Pritzker, GSK (reduced sample), and WTCCC.

Table S2. NIMH/Pritzker, GSK (reduced sample), and WTCCC bipolar meta-analysis association results: loci with  $P < 10^{-5}$

| SNP        | Chr | Position*<br>bp | Risk/<br>nonrisk<br>allele | Control<br>risk<br>allele<br>freq <sup>†</sup> | NIMH/Pritzker       |                      | GSK                 |                      | WTCCC                            |                      | Meta                |                      | Heterogeneity      |       |
|------------|-----|-----------------|----------------------------|------------------------------------------------|---------------------|----------------------|---------------------|----------------------|----------------------------------|----------------------|---------------------|----------------------|--------------------|-------|
|            |     |                 |                            |                                                | OR (95% CI)         | P                    | OR (95% CI)         | P                    | OR (95% CI)                      | P                    | OR (95% CI)         | P                    | I <sup>2</sup> , % | P     |
| rs472913   | 1   | 60,807,579      | C/G                        | 0.50                                           | 1.12<br>(0.97–1.29) | 0.11                 | 1.17<br>(1.00–1.36) | 0.051                | 1.20 <sup>‡</sup><br>(1.11–1.28) | $6.3 \times 10^{-7}$ | 1.18<br>(1.11–1.25) | $2.0 \times 10^{-7}$ | 0                  | 0.72  |
| rs12568099 | 1   | 195,482,079     | T/C                        | 0.98                                           | 1.48<br>(0.90–2.42) | 0.12                 | 2.17<br>(1.26–3.77) | 0.0054               | 1.49<br>(1.20–1.85)              | 0.00031              | 1.56<br>(1.28–1.9)  | $9.8 \times 10^{-6}$ | 0                  | 0.44  |
| rs13409348 | 2   | 79,451,643      | G/C                        | 0.24                                           | 1.12<br>(0.95–1.32) | 0.18                 | 1.20<br>(1.00–1.43) | 0.045                | 1.22<br>(1.12–1.33)              | $7.1 \times 10^{-6}$ | 1.20<br>(1.11–1.29) | $2.7 \times 10^{-6}$ | 0                  | 0.67  |
| rs6733011  | 2   | 98,924,020      | G/A                        | 0.46                                           | 1.11<br>(0.95–1.29) | 0.19                 | 1.13<br>(0.96–1.32) | 0.14                 | 1.20<br>(1.11–1.29)              | $1.9 \times 10^{-6}$ | 1.17<br>(1.1–1.25)  | $2.6 \times 10^{-6}$ | 0                  | 0.59  |
| rs1042779  | 3   | 52,796,051      | A/G                        | 0.63                                           | 1.20<br>(1.04–1.38) | 0.015                | 1.31<br>(1.11–1.54) | 0.0012               | 1.16<br>(1.07–1.25)              | 0.00012              | 1.19<br>(1.11–1.27) | $1.8 \times 10^{-7}$ | 0                  | 0.40  |
| rs7427021  | 3   | 165,244,666     | G/A                        | 0.56                                           | 1.05<br>(0.91–1.23) | 0.49                 | 1.25<br>(1.06–1.47) | 0.0089               | 1.17<br>(1.09–1.26)              | $1.5 \times 10^{-5}$ | 1.16<br>(1.09–1.24) | $4.9 \times 10^{-6}$ | 14                 | 0.31  |
| rs2537859  | 4   | 55,323,746      | T/C                        | 0.60                                           | 1.05<br>(0.91–1.20) | 0.53                 | 1.41<br>(1.21–1.65) | $1.1 \times 10^{-5}$ | 1.14<br>(1.06–1.23)              | 0.00071              | 1.16<br>(1.09–1.24) | $4.2 \times 10^{-6}$ | 76                 | 0.014 |
| rs17418283 | 5   | 94,180,344      | C/T                        | 0.28                                           | 1.09<br>(0.93–1.28) | 0.31                 | 1.19<br>(1.01–1.41) | 0.038                | 1.25<br>(1.15–1.36)              | $9.7 \times 10^{-8}$ | 1.21<br>(1.13–1.3)  | $1.3 \times 10^{-7}$ | 15                 | 0.31  |
| rs17169582 | 5   | 135,343,067     | G/A                        | 0.91                                           | 1.21<br>(0.94–1.55) | 0.14                 | 1.11<br>(0.86–1.43) | 0.42                 | 1.30<br>(1.16–1.46)              | $7.5 \times 10^{-6}$ | 1.26<br>(1.14–1.39) | $9.8 \times 10^{-6}$ | 0                  | 0.50  |
| rs6901299  | 6   | 123,817,025     | G/A                        | 0.85                                           | 1.05<br>(0.86–1.27) | 0.66                 | 1.18<br>(0.95–1.46) | 0.12                 | 1.26<br>(1.15–1.39)              | $2.0 \times 10^{-6}$ | 1.21<br>(1.11–1.31) | $9.7 \times 10^{-6}$ | 35                 | 0.21  |
| rs6990255  | 8   | 34,246,490      | T/C                        | 0.95                                           | 1.41<br>(1.00–2.00) | 0.048                | 1.28<br>(0.91–1.81) | 0.16                 | 1.33 <sup>‡</sup><br>(1.16–1.51) | $5.7 \times 10^{-5}$ | 1.33<br>(1.18–1.51) | $5.8 \times 10^{-6}$ | 0                  | 0.92  |
| rs2905072  | 9   | 132,874,589     | A/G                        | 0.77                                           | 1.43<br>(1.20–1.70) | $5.8 \times 10^{-5}$ | 1.14<br>(0.95–1.38) | 0.16                 | 1.16<br>(1.05–1.28)              | 0.0043               | 1.21<br>(1.11–1.32) | $6.4 \times 10^{-6}$ | 56                 | 0.10  |
| rs2242663  | 11  | 66,091,884      | T/C                        | 0.25                                           | 1.29<br>(1.09–1.53) | 0.0028               | 1.32<br>(1.10–1.59) | 0.0024               | 1.15<br>(1.05–1.25)              | 0.0015               | 1.20<br>(1.11–1.29) | $1.3 \times 10^{-6}$ | 33                 | 0.23  |
| rs6494849  | 15  | 68,267,668      | A/C                        | 0.12                                           | 1.24<br>(1.00–1.54) | 0.049                | 1.11<br>(0.88–1.38) | 0.38                 | 1.26<br>(1.14–1.40)              | $1.0 \times 10^{-5}$ | 1.23<br>(1.13–1.35) | $6.5 \times 10^{-6}$ | 0                  | 0.57  |
| rs1035050  | 17  | 44,919,011      | T/C                        | 0.40                                           | 1.16<br>(1.01–1.34) | 0.038                | 1.12<br>(0.96–1.31) | 0.13                 | 1.19<br>(1.09–1.29)              | $6.9 \times 10^{-5}$ | 1.17<br>(1.09–1.25) | $9.0 \times 10^{-6}$ | 0                  | 0.84  |
| rs7250872  | 19  | 1,762,603       | T/C                        | 0.69                                           | 1.18<br>(1.01–1.37) | 0.035                | 1.33<br>(1.14–1.56) | 0.00043              | 1.18<br>(1.06–1.30)              | 0.0024               | 1.21<br>(1.12–1.31) | $1.7 \times 10^{-6}$ | 0                  | 0.41  |

GSK reduced sample: Excluding 261 BP cases also present in WTCCC sample.

\*NBCI Build 35-bp position.

<sup>†</sup>Weighted average of control risk allele frequency for NIMH/Pritzker, GSK (reduced sample), and WTCCC.

<sup>‡</sup>Designated as strong or moderate association in WTCCC (2007) supplementary table 7A and/or 9.

**Table S3. Genes in regions with SNPs with  $P < 10^{-6}$  in the three study meta-analysis**

| Chr | Starting position basepair* | Ending position Basepair* | Gene symbol      | Gene name                                                                              |
|-----|-----------------------------|---------------------------|------------------|----------------------------------------------------------------------------------------|
| 3   | 52,084,309                  | 52,163,460                | <i>WDR51A</i>    | WD repeat domain 51A                                                                   |
| 3   | 52,207,155                  | 52,223,383                | <i>ALAS1</i>     | aminolevulinate, delta-, synthase 1                                                    |
| 3   | 52,230,137                  | 52,235,219                | <i>TLR9</i>      | toll-like receptor 9                                                                   |
| 3   | 52,237,666                  | 52,248,223                | <i>TWF2</i>      | twinfilin, actin-binding protein, homolog 2 (Drosophila)                               |
| 3   | 52,255,264                  | 52,259,655                | <i>PPM1M</i>     | protein phosphatase 1M (PP2C domain containing)                                        |
| 3   | 52,263,477                  | 52,287,699                | <i>WDR82</i>     | WD repeat domain 82                                                                    |
| 3   | 52,296,911                  | 52,302,532                | <i>GLYCTK</i>    | glycerate kinase                                                                       |
| 3   | 52,325,374                  | 52,409,552                | <i>DNAH1</i>     | dynein, axonemal, heavy chain 1                                                        |
| 3   | 52,410,066                  | 52,419,049                | <i>BAP1</i>      | BRCA1 associated protein-1 (ubiquitin carboxy-terminal hydrolase)                      |
| 3   | 52,419,566                  | 52,432,696                | <i>PHF7</i>      | PHD finger protein 7                                                                   |
| 3   | 52,442,307                  | 52,454,083                | <i>SEMA3G</i>    | sema domain, immunoglobulin domain (Ig), short basic domain, secreted, (semaphorin) 3G |
| 3   | 52,460,147                  | 52,463,097                | <i>TNNC1</i>     | troponin C type 1 (slow)                                                               |
| 3   | 52,464,563                  | 52,502,128                | <i>NISCH</i>     | nischarin                                                                              |
| 3   | 52,504,395                  | 52,533,549                | <i>STAB1</i>     | stabilin 1                                                                             |
| 3   | 52,533,424                  | 52,544,133                | <i>NT5DC2</i>    | 5'-nucleotidase domain containing 2                                                    |
| 3   | 52,545,660                  | 52,549,626                | <i>LOC440957</i> | similar to CG32736-PA                                                                  |
| 3   | 52,554,407                  | 52,694,906                | <i>PBRM1</i>     | polybromo 1                                                                            |
| 3   | 52,694,975                  | 52,703,548                | <i>GNL3</i>      | guanine nucleotide binding protein-like 3 (nucleolar)                                  |
| 3   | 52,703,544                  | 52,715,088                | <i>GLT8D1</i>    | glycosyltransferase 8 domain containing 1                                              |
| 3   | 52,714,896                  | 52,717,237                | <i>SPCS1</i>     | signal peptidase complex subunit 1 homolog ( <i>S. cerevisiae</i> )                    |
| 3   | 52,719,840                  | 52,779,991                | <i>NEK4</i>      | NIMA (never in mitosis gene a)-related kinase 4                                        |
| 3   | 52,786,647                  | 52,801,117                | <i>ITIH1</i>     | inter-alpha (globulin) inhibitor H1                                                    |
| 3   | 52,803,823                  | 52,818,065                | <i>ITIH3</i>     | inter-alpha (globulin) inhibitor H3                                                    |
| 3   | 52,822,046                  | 52,839,734                | <i>ITIH4</i>     | inter-alpha (globulin) inhibitor H4 (plasma Kallikrein-sensitive glycoprotein)         |
| 3   | 52,842,176                  | 52,844,260                | <i>MUSTN1</i>    | musculoskeletal, embryonic nuclear protein 1                                           |
| 3   | 52,848,937                  | 52,906,587                | <i>TMEM110</i>   | transmembrane protein 110                                                              |
| 3   | 52,913,667                  | 53,055,110                | <i>SFMBT1</i>    | Scm-like with four mbt domains 1                                                       |
| 3   | 53,099,850                  | 53,139,503                | <i>RFT1</i>      | RFT1 homolog ( <i>S. cerevisiae</i> )                                                  |
| 3   | 53,170,262                  | 53,201,771                | <i>PRKCD</i>     | protein kinase C, delta                                                                |
| 5   | 93,880,673                  | 93,980,065                | <i>C5orf36</i>   | chromosome 5 open reading frame 36                                                     |
| 5   | 93,980,146                  | 94,057,329                | <i>ANKRD32</i>   | ankyrin repeat domain 32                                                               |
| 5   | 94,068,956                  | 94,646,035                | <i>MCTP1</i>     | multiple C2 domains, transmembrane 1                                                   |
| 5   | 94,752,803                  | 94,811,900                | <i>FAM81B</i>    | family with sequence similarity 81, member B                                           |
| 5   | 94,825,879                  | 94,916,438                | <i>TTC37</i>     | tetratricopeptide repeat domain 37                                                     |

\*NCBI Build 35-bp position.

**Table S4A. NIMH/Pritzker imputation quality and bipolar association analysis results with and without principal components (PCs)**

| SNP        | Chr | Imputation Quality $r^2$ | PCs              |          | No PCs           |          |
|------------|-----|--------------------------|------------------|----------|------------------|----------|
|            |     |                          | OR (95% CI)      | <i>P</i> | OR (95% CI)      | <i>P</i> |
| rs472913   | 1   | 0.95                     | 1.12 (0.97–1.29) | 0.11     | 1.13 (0.99–1.30) | 0.079    |
| rs1042779  | 3   | Genotyped                | 1.20 (1.04–1.38) | 0.015    | 1.22 (1.06–1.41) | 0.0067   |
| rs17418283 | 5   | 0.89                     | 1.09 (0.93–1.28) | 0.31     | 1.08 (0.92–1.27) | 0.32     |

**Table S4B. GSK (reduced sample) imputation quality and bipolar association analysis results with and without principal components (PCs)**

| SNP        | Chr | Imputation quality $r^2$ | PCs              |          | No PCs           |          |
|------------|-----|--------------------------|------------------|----------|------------------|----------|
|            |     |                          | OR (95% CI)      | <i>P</i> | OR (95% CI)      | <i>P</i> |
| rs472913   | 1   | 0.97                     | 1.17 (1.00–1.36) | 0.051    | 1.19 (1.02–1.38) | 0.027    |
| rs1042779  | 3   | Genotyped                | 1.31 (1.11–1.54) | 0.0012   | 1.35 (1.15–1.58) | 0.00026  |
| rs17418283 | 5   | 0.98                     | 1.19 (1.01–1.40) | 0.038    | 1.18 (1.00–1.40) | 0.044    |

Reduced sample: Excluding 261 BP cases also present in WTCCC sample.





Table S5. Three study meta-analysis with and without adjustment for principal components (PCs)

| SNP        | Chr | PCs              |                      | No PCs           |                      |
|------------|-----|------------------|----------------------|------------------|----------------------|
|            |     | OR (95% CI)      | <i>P</i>             | OR (95% CI)      | <i>P</i>             |
| rs472913   | 1   | 1.18 (1.11–1.25) | $2.0 \times 10^{-7}$ | 1.18 (1.11–1.26) | $7.4 \times 10^{-8}$ |
| rs1042779  | 3   | 1.19 (1.11–1.27) | $1.8 \times 10^{-7}$ | 1.20 (1.13–1.28) | $2.7 \times 10^{-8}$ |
| rs17418283 | 5   | 1.21 (1.13–1.30) | $1.3 \times 10^{-7}$ | 1.20 (1.12–1.29) | $2.3 \times 10^{-7}$ |
